# Supplementary material for: Mindfulness and skills-based eHealth intervention to reduce distress in cancer-affected patients in the Reduct trial: Intervention protocol of the make it training optimized
Source: PubMed Central journal article supplement (PMC9650647; doi:10.3389/fpsyt.2022.1037158), 2022-10-28
Supplement: Data_Sheet_1.pdf [file Data_Sheet_1.pdf]

## Supplementary Material

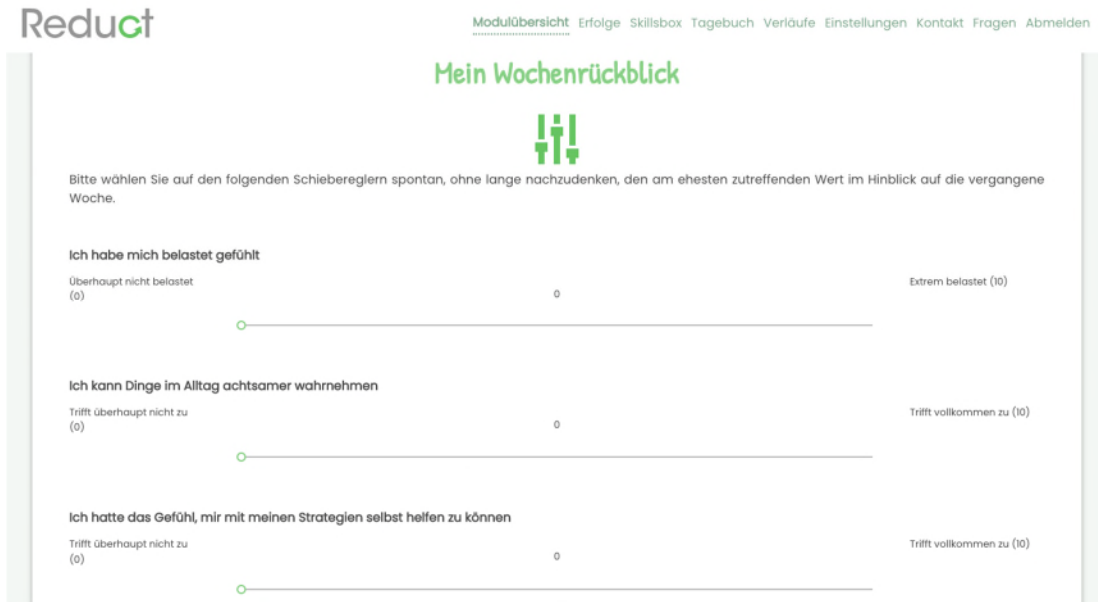

**Supplementary Screenshot 1.** Self-evaluation of Distress Level, Skills and Mindfulness

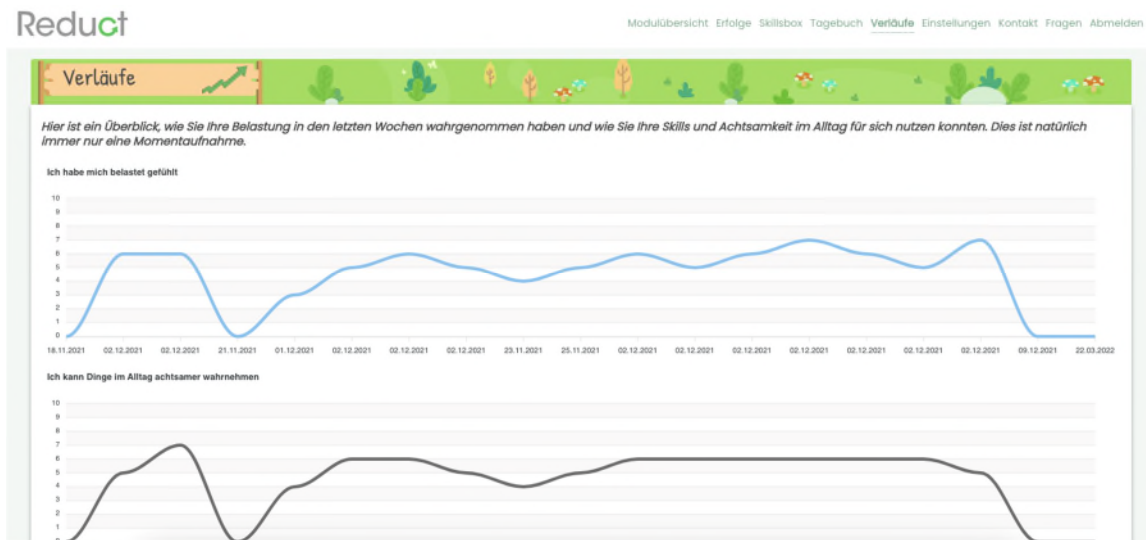

**Supplementary Screenshot 2.** Visualization of Progress

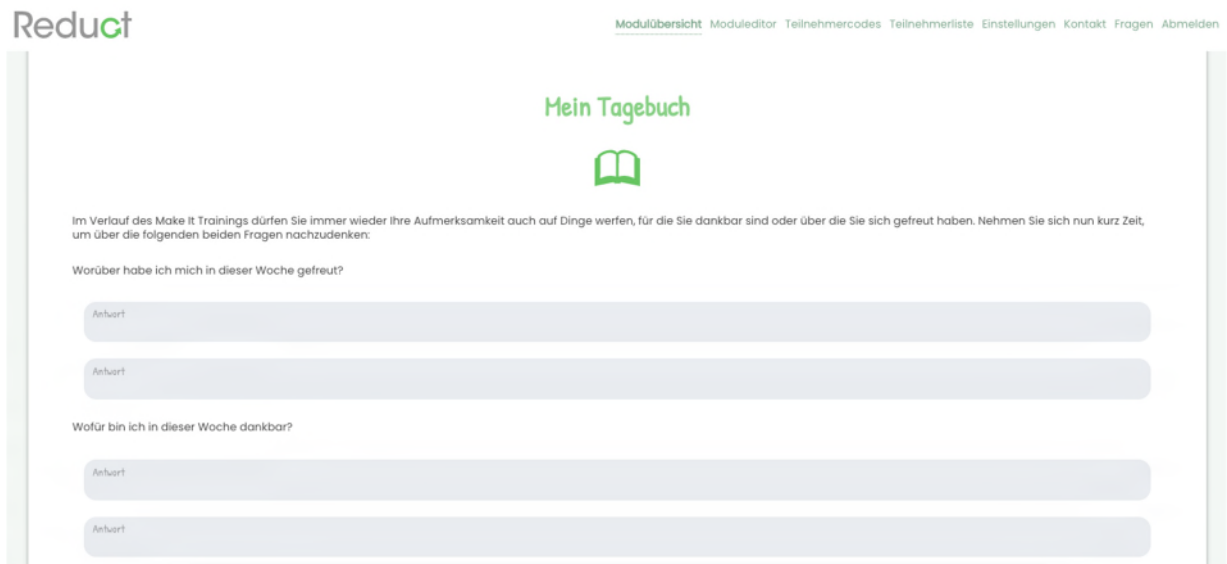

**Supplementary Screenshot 3.** Gratitude Journal

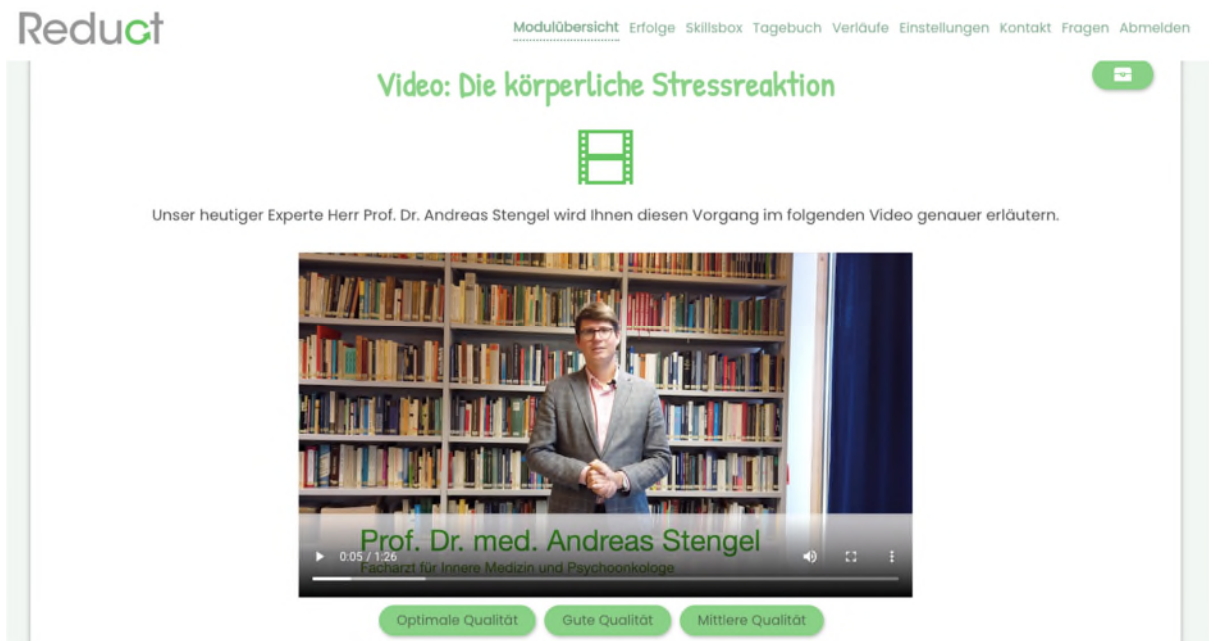

**Supplementary Screenshot 4.** Psychoeducational Video With a Healthcare Professional

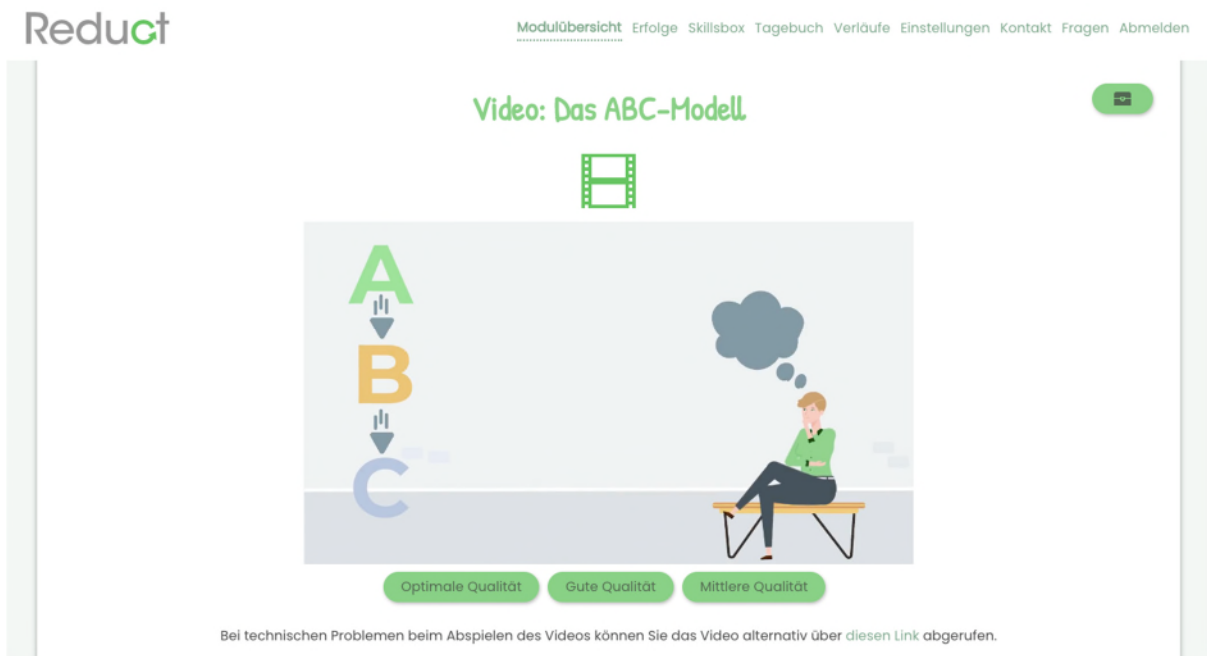

Supplementary Screenshot 5. Psychoeducational Video: Custom Animated Clip

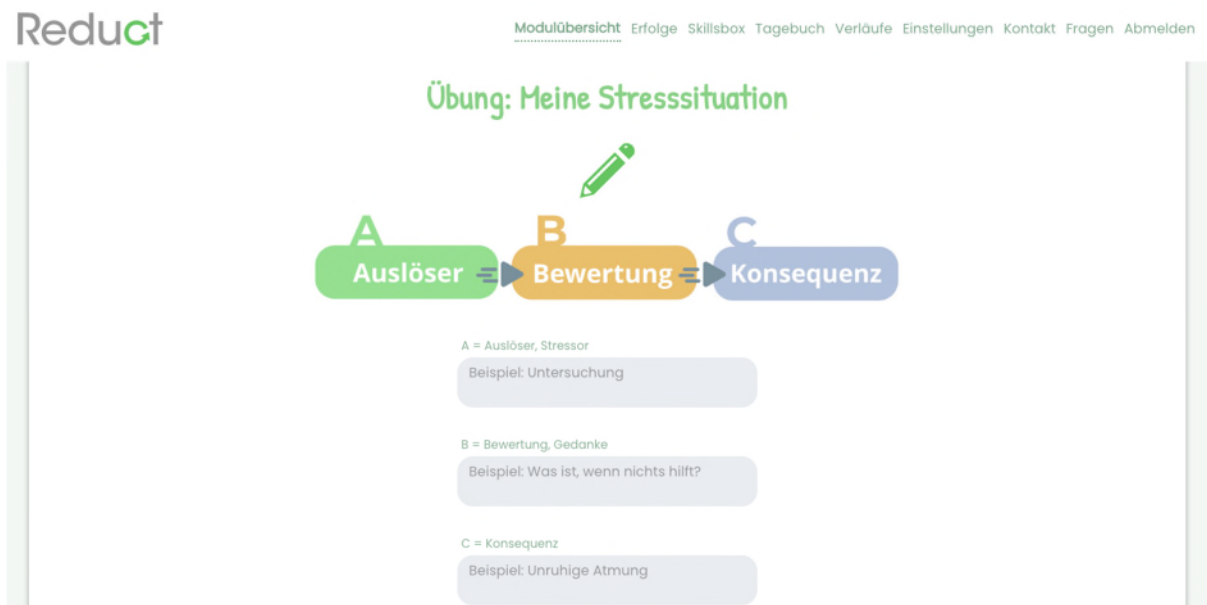

Supplementary Screenshot 6. Skills Training



## Mein Wochenplan

Ein Wochenplan kann Ihnen dabei helfen, eine Struktur in Ihren Alltag zu bringen. Strukturen können für viele Menschen haltgebend sein, da sie Sicherheit und Klarheit geben. Dies kann besonders in schweren Zeiten hilfreich sein.

Im Folgenden haben wir für Sie ein Beispiel für einen Wochenplan erstellt, an dem Sie sich orientieren können. Sie können Ihren Tagesplan sowohl mit alltäglichen Aufgaben als auch mit Ideen und Hobbys ergänzen.

Hier finden Sie ein Beispiel als Ausfüllhilfe:

Datum: 15.11.2021

|             | Montag                | Dienstag  | Mittwoch        | Donnerstag | Freitag         | Samstag    | Sonntag               |
|-------------|-----------------------|-----------|-----------------|------------|-----------------|------------|-----------------------|
| Morgens     | Ausgiebiges Frühstück | Sport     | Haushalt        | Meditation | Freunde/Familie | Hobby      | Ausgiebiges Frühstück |
| Mittags     | Haushalt              | Spazieren |                 |            |                 | Sport      |                       |
| Nachmittags |                       | Kochen    |                 | Buch Lesen | Haushalt        | Entspannen | Spazieren             |
| Abends      | Meditation            |           | Freunde/Familie |            | Meditation      | Restaurant | Kochen                |

Reduct

Grafik: Planning by Design Circle from the Noun Project

makeit

### Supplementary Screenshot 7. Downloadable Exercises

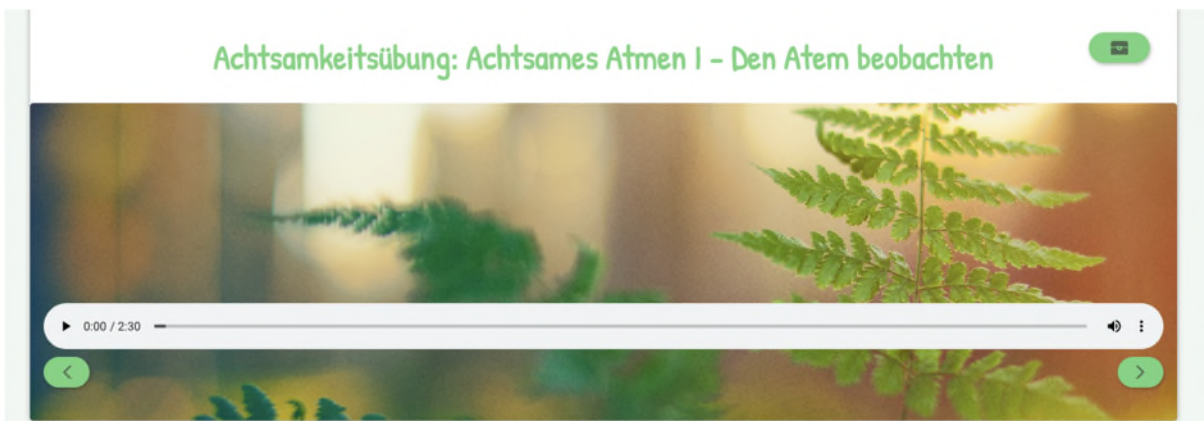

### Supplementary Screenshot 8. Audio-guided Mindfulness Exercises

**Mein Achtsamkeitsplan**

Wann möchten Sie in dieser Woche eine Achtsamkeitsübung machen? In welchen Alltagsmomenten möchten Sie achtsam sein?

|                 |                                     |     |          |                                     |     |          |
|-----------------|-------------------------------------|-----|----------|-------------------------------------|-----|----------|
| <b>MONTAG</b>   | <input type="checkbox"/> Morgens um | Uhr | Notizen: | <input type="checkbox"/> Morgens um | Uhr | Notizen: |
|                 | <input type="checkbox"/> Mittags um | Uhr | Notizen: | <input type="checkbox"/> Mittags um | Uhr | Notizen: |
|                 | <input type="checkbox"/> Abends um  | Uhr | Notizen: | <input type="checkbox"/> Abends um  | Uhr | Notizen: |
| <b>MITTWOCH</b> | <input type="checkbox"/> Morgens um | Uhr | Notizen: | <input type="checkbox"/> Morgens um | Uhr | Notizen: |
|                 | <input type="checkbox"/> Mittags um | Uhr | Notizen: | <input type="checkbox"/> Mittags um | Uhr | Notizen: |
|                 | <input type="checkbox"/> Abends um  | Uhr | Notizen: | <input type="checkbox"/> Abends um  | Uhr | Notizen: |
| <b>FREITAG</b>  | <input type="checkbox"/> Morgens um | Uhr | Notizen: | <input type="checkbox"/> Morgens um | Uhr | Notizen: |
|                 | <input type="checkbox"/> Mittags um | Uhr | Notizen: | <input type="checkbox"/> Mittags um | Uhr | Notizen: |
|                 | <input type="checkbox"/> Abends um  | Uhr | Notizen: | <input type="checkbox"/> Abends um  | Uhr | Notizen: |
| <b>SONNTAG</b>  | <input type="checkbox"/> Morgens um | Uhr | Notizen: | <input type="checkbox"/> Morgens um | Uhr | Notizen: |
|                 | <input type="checkbox"/> Mittags um | Uhr | Notizen: | <input type="checkbox"/> Mittags um | Uhr | Notizen: |
|                 | <input type="checkbox"/> Abends um  | Uhr | Notizen: | <input type="checkbox"/> Abends um  | Uhr | Notizen: |

**ACHTSAME ALLTAGSMOMENTE**

|                                      |                                       |
|--------------------------------------|---------------------------------------|
| <input type="checkbox"/> Frühstück   | <input type="checkbox"/> Zähneputzen  |
| <input type="checkbox"/> Spaziergang | <input type="checkbox"/> Zeitunglesen |
| <input type="checkbox"/> _____       | <input type="checkbox"/> _____        |

Grafiken: Quote by Adrien Coquet from the Noun Project, Eye by Valodin Anton from the Noun Project, herbal tea by Zohaib Bajwa from the Noun Project, Planning by Design Circle from the Noun Project

Supplementary Screenshot 9. Mindfulness Exercise Plan

**Reduct** Modulübersicht [Erfolge](#) [Skillsbox](#) [Tagebuch](#) [Verläufe](#) [Einstellungen](#) [Kontakt](#) [Fragen](#) [Abmelden](#)

**Skillsbox**

Gefühle (Donnerstag, 02.12.21)

Modul 4: Gefühle Donnerstag, 02.12.21

11 / 27

**Übung: Meine Phasen der Krankheitsverarbeitung**

Supplementary Screenshot 10. Skillsbox

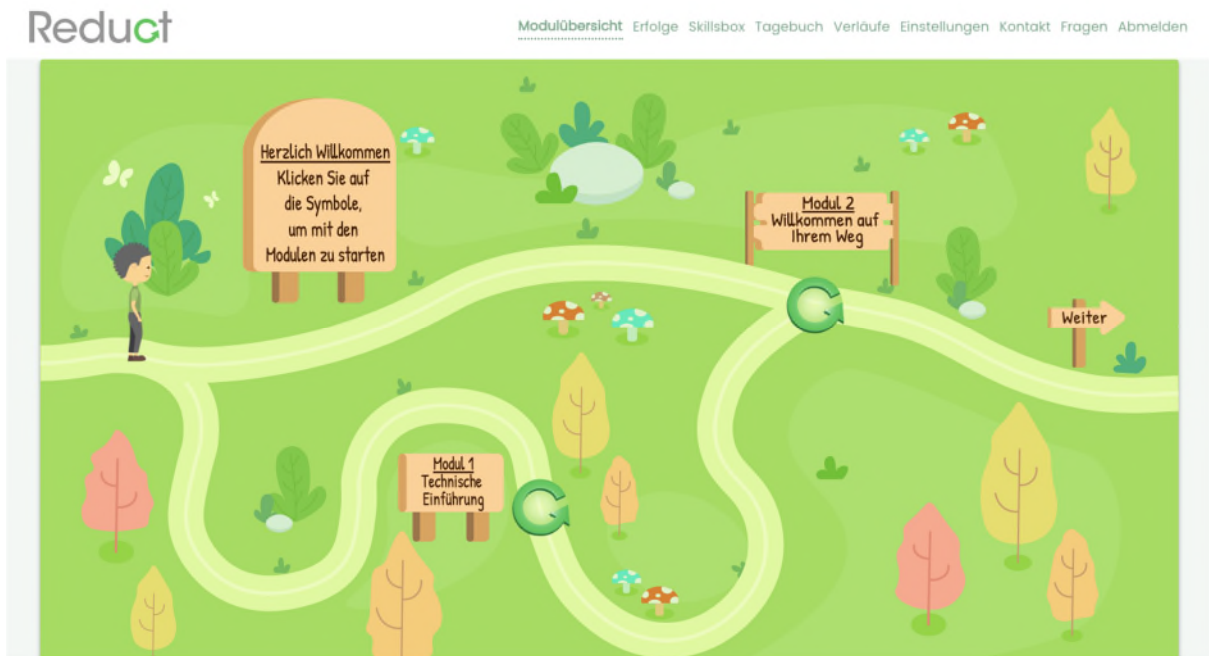

Supplementary Screenshot 11. Avatar 1

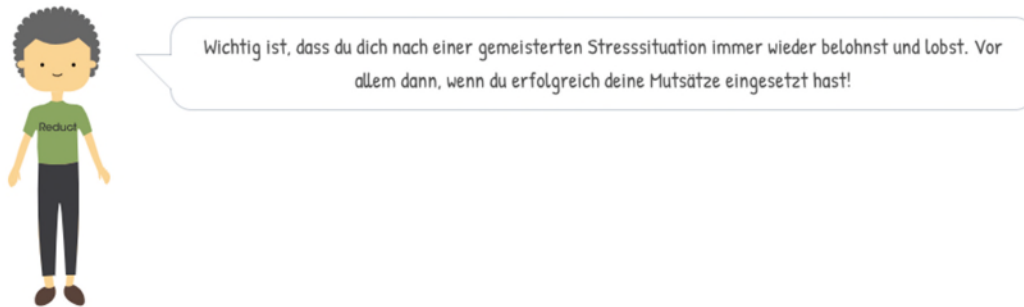

Supplementary Screenshot 12. Avatar 2



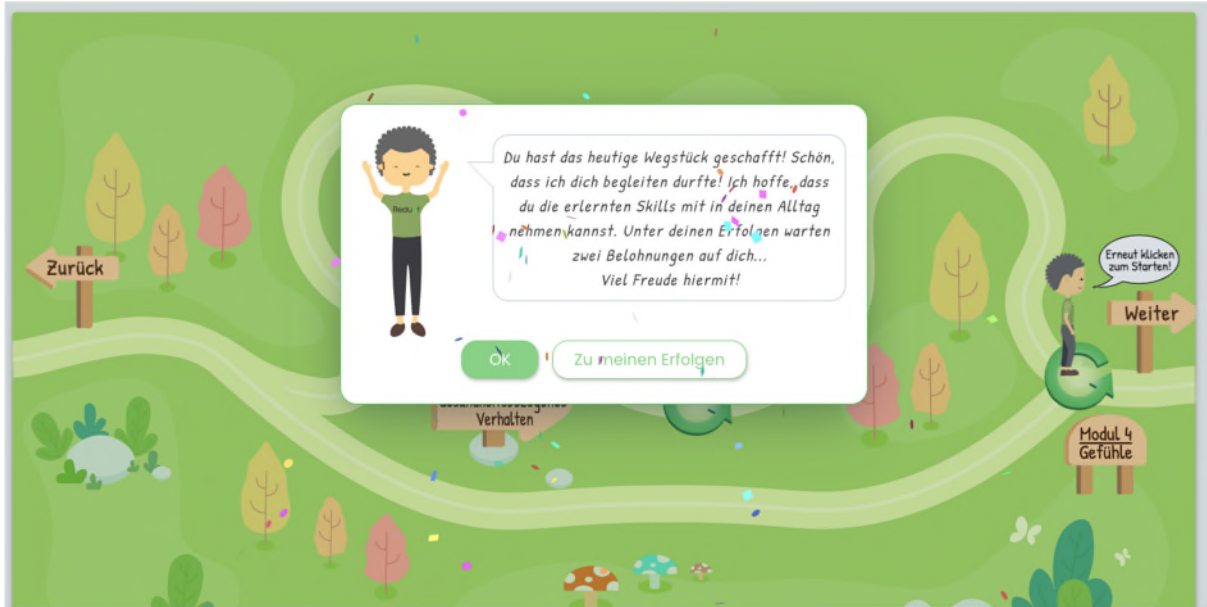

Supplementary Screenshot 13. Rewards 1

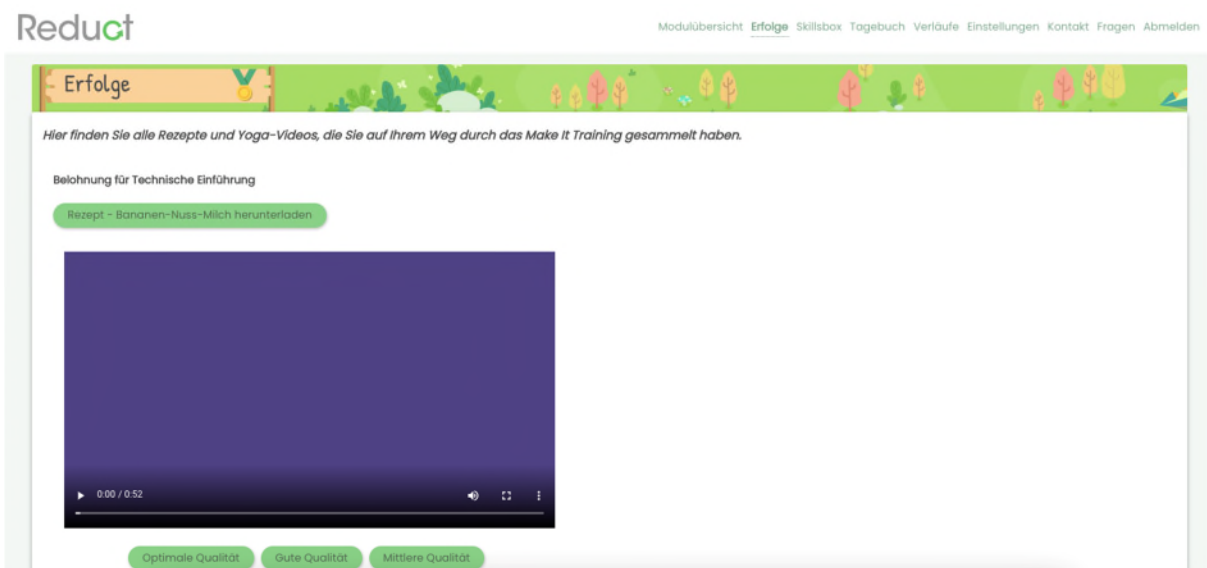

Supplementary Screenshot 14. Rewards 2
