# Supplementary material for: Mindfulness and skills-based eHealth intervention to reduce distress in cancer-affected patients in the Reduct trial: Intervention protocol of the make it training optimized
Source: Front Psychiatry. 2022 Oct 28;13:1037158. doi: 10.3389/fpsyt.2022.1037158 (PMC9650647; doi:10.3389/fpsyt.2022.1037158)
Supplement: Supplementary file 3 [file Table_2.pdf]

## Supplementary Material

**Supplementary Table 2.** Overview of the module contents

|   | Module                  | Topic                                                                           | Skills                                                                                                                                                                                                       |                                                                                                                                                                                                                                                          |                                                                                                | Mindfulness                                                                           |                                              |
|---|-------------------------|---------------------------------------------------------------------------------|--------------------------------------------------------------------------------------------------------------------------------------------------------------------------------------------------------------|----------------------------------------------------------------------------------------------------------------------------------------------------------------------------------------------------------------------------------------------------------|------------------------------------------------------------------------------------------------|---------------------------------------------------------------------------------------|----------------------------------------------|
|   |                         |                                                                                 | Psychoeducation                                                                                                                                                                                              | Video(s)                                                                                                                                                                                                                                                 | Skills-Exercise(s)                                                                             | Topic                                                                                 | Audio-guided Practice                        |
| 1 | Technical Introduction  | A quick introduction to the app                                                 | /                                                                                                                                                                                                            | Technical Introduction Video<br>(How to use the Make It Training) <sup>2</sup>                                                                                                                                                                           | /                                                                                              | /                                                                                     | /                                            |
| 2 | Welcome to your Path    | Introduction to the structure of the Make It Training and to Mindfulness        | <b>Introducing:</b> <ul style="list-style-type: none"> <li>- The Make It Training: What can participants expect</li> <li>- The gratitude Journal</li> <li>- Mindfulness practice and its benefits</li> </ul> | <b>1. Introducing the Make It Training</b> (Prof. Dr. Martin Teufel, Dr. Alexander Bäuerle) <sup>1</sup><br><b>2. Introducing Margit K.</b> <sup>1</sup><br><b>3. What is mindfulness?</b> <sup>2</sup><br><b>4. Practicing Mindfulness</b> <sup>2</sup> | <b>1: My goal(s) for the Make It Training</b>                                                  | <b>Observing the Breath to anchor in the moment</b>                                   | <b>Body Scan II – Mindful Body Awareness</b> |
| 3 | Health-related Behavior | Different aspects of promoting physical and mental health during cancer illness | <ul style="list-style-type: none"> <li>- creating a daily structure</li> <li>- a healthy diet</li> <li>- dealing with online health information</li> </ul>                                                   | 1: A healthy diet in the context of cancer (Kristine Schweins) <sup>1</sup>                                                                                                                                                                              | 1: Planning my day                                                                             | Anchoring in the moment by paying attention to our senses non-judgmentally - smelling | Mindful Smelling                             |
| 4 | Emotions                | Accepting and dealing with emotions as a part of processing the cancer illness. | <ul style="list-style-type: none"> <li>- The four stages of dealing with cancer</li> <li>- Making room for emotions</li> </ul>                                                                               | <b>1: The four stages of dealing with cancer</b> (Prof. Dr. Yesim Erim) <sup>1</sup><br><b>2: The four stages of dealing with cancer</b> (Summary) <sup>2</sup>                                                                                          | <b>Exercise 1: My phases of dealing with cancer</b><br><b>Exercise 2: The Room of emotions</b> | <b>Mindfully experiencing thoughts and emotions to distance from them</b>             | <b>Mindful Experiencing</b>                  |

|   | Module               | Topic                                                                                     | Skills                                                                                                                                                                                                                                                                                                                |                                                                                                                                                                                                                                                                                    |                                                                                                                                                                                                                | Mindfulness                                                                                 |                                      |
|---|----------------------|-------------------------------------------------------------------------------------------|-----------------------------------------------------------------------------------------------------------------------------------------------------------------------------------------------------------------------------------------------------------------------------------------------------------------------|------------------------------------------------------------------------------------------------------------------------------------------------------------------------------------------------------------------------------------------------------------------------------------|----------------------------------------------------------------------------------------------------------------------------------------------------------------------------------------------------------------|---------------------------------------------------------------------------------------------|--------------------------------------|
|   |                      |                                                                                           | Psychoeducation                                                                                                                                                                                                                                                                                                       | Video(s)                                                                                                                                                                                                                                                                           | Skills-Exercise(s)                                                                                                                                                                                             | Topic                                                                                       | Audio-guided Practice                |
| 5 | Fear                 | Dealing with cancer-related fears including fear of progression.                          | <ul style="list-style-type: none"> <li>- Why we experience Fear</li> <li>- Fear of Progression</li> </ul>                                                                                                                                                                                                             | 1: Why we experience fear and the role of our thoughts <sup>2</sup><br>2: Meeting today's expert: Dr. Monika Schmid <sup>1</sup><br>3: Coping with fear of progression (Dr. Monika Schmid) <sup>1</sup><br>4: Using Mindfulness to cope with fear (Dr. Monika Schmid) <sup>1</sup> | 1: My experience of fear of Progression<br>2: Where do I feel fear? (And when)<br>3: My emergency case                                                                                                         | Using a visualization to take the weight from distressing thoughts and emotions             | Thoughts to Feathers                 |
| 6 | Pain                 | Understanding and dealing with cancer-illness- and treatment-related pain.                | <ul style="list-style-type: none"> <li>- Pain and cancer</li> <li>- The function of pain</li> <li>- Coping strategies</li> <li>• Thought stopping</li> <li>• Guiding attention</li> </ul>                                                                                                                             | 1: How pain emerges (Dr. Caroline Rometsch) <sup>1</sup><br>2: Acute vs recurring pain <sup>2</sup><br>3: Coping with pain (Dr. Caroline Rometsch) <sup>1</sup><br>4: Thought stopping <sup>2</sup>                                                                                | 1: Pain Journal<br>2: Thought-stopping technique                                                                                                                                                               | Observing bodily sensations non-judgmentally                                                | Body Scan I- Mindful Body experience |
| 7 | Sleep                | Foundations of restful sleep: Strategies and the role of thoughts and emotions that arise | <ul style="list-style-type: none"> <li>- How cancer can affect sleep</li> <li>- What makes sleep restful</li> <li>- Strategies for restful sleep</li> <li>• Thought stopping</li> <li>• Creating a designated place for worrying</li> <li>• Adopting an evening routine to set the stage for restful sleep</li> </ul> | 1: How thoughts can impact our sleep <sup>2</sup><br>2: Thought stopping (repetition) <sup>2</sup><br>3: Creating a place for worrying <sup>2</sup><br>4: More Tips for falling and staying asleep (Dr. Christoph Schöbel) <sup>1</sup>                                            | 1: Collection of distressing thoughts<br>2: Thought stopping (repetition)<br>3: Bedtime routine                                                                                                                | Using a visualization to let go of thoughts and emotions                                    | Mindfully Letting Go                 |
| 8 | Activating Resources | Discovering and consciously using personal resources of strength to cope with cancer      | The vicious circle of thoughts                                                                                                                                                                                                                                                                                        | 1: The circle of thoughts <sup>2</sup><br>2: Using personal resources (Martina Madl) <sup>1</sup><br>3: Quitting the thought circle <sup>2</sup>                                                                                                                                   | 1: My Circle of Thoughts<br>2: Quitting the thought circle <ul style="list-style-type: none"> <li>- Seeking consolation/support</li> <li>- Accepting emotions</li> <li>- Planning social activities</li> </ul> | Anchoring in the moment by paying attention to our senses non-judgmentally - <i>hearing</i> | Mindful hearing                      |

|    |                         |                                                                                            |                                                                                                                                                                                                          |                                                                                                                                                                         | - Planning joyful activities                                                                                                                                                                                                                                                     |                                                                                            |                                        |
|----|-------------------------|--------------------------------------------------------------------------------------------|----------------------------------------------------------------------------------------------------------------------------------------------------------------------------------------------------------|-------------------------------------------------------------------------------------------------------------------------------------------------------------------------|----------------------------------------------------------------------------------------------------------------------------------------------------------------------------------------------------------------------------------------------------------------------------------|--------------------------------------------------------------------------------------------|----------------------------------------|
|    |                         |                                                                                            | Skills                                                                                                                                                                                                   |                                                                                                                                                                         |                                                                                                                                                                                                                                                                                  | Mindfulness                                                                                |                                        |
|    | Module                  | Topic                                                                                      | Psychoeducation                                                                                                                                                                                          | Video(s)                                                                                                                                                                | Skills-Exercise(s)                                                                                                                                                                                                                                                               | Topic                                                                                      | Audio-guided Practice                  |
| 9  | Positivity              | Making room for positive experiences; noticing accomplishments and step-by-step planning.  | <ul style="list-style-type: none"> <li>- Room for positivity</li> <li>- What positivity means (and what it doesn't mean)</li> </ul>                                                                      | 1: Step by Step <sup>2</sup>                                                                                                                                            | 1: Which steps have I mastered?<br>(Reflecting on successes)<br>2: Focusing on the next step<br>3: Using affirmative sentences                                                                                                                                                   | Becoming aware and fully experiencing beautiful moments                                    | Mindful Moment                         |
| 10 | Body Awareness          | Dealing with cancer-related bodily changes                                                 | <ul style="list-style-type: none"> <li>- How cancer can affect the body (and body perception)</li> <li>- Dealing with bodily changes</li> </ul>                                                          | 1: Body Perception <sup>2</sup><br>2: Dealing with bodily changes (Dr. Kaya) <sup>1</sup>                                                                               | 1: How did my body change?<br>2: The weighing pan<br>3: Bodily changes as a part of my cancer journey<br><ul style="list-style-type: none"> <li>- What me and my body have accomplished</li> <li>- Taking care of my body</li> <li>- Paying attention to body signals</li> </ul> | Noticing sensations and needs of my body non-judgmentally                                  | Body Scan II – Mindful Body Awareness  |
| 11 | Exercise and Relaxation | Finding a healthy balance between exercise and relaxation as part of recovery from cancer. | <ul style="list-style-type: none"> <li>- Exercise in the context of cancer: Benefits and things to consider</li> <li>- Balancing exercise and relaxation</li> </ul>                                      |                                                                                                                                                                         | 1: Small changes with big impact<br>(Incorporating brief elements of exercise into everyday life)<br>2: My energy balance<br><ul style="list-style-type: none"> <li>- Energy takers</li> <li>- Energy gainers</li> </ul>                                                         | Using the power of the Breath to relax                                                     | Mindful Breathing II – Triangle Breath |
| 12 | Stress Management       | Mastering stressful cancer-related situations                                              | <ul style="list-style-type: none"> <li>- The significance of thoughts for subjective experience and feelings of distress (ABC Model)</li> <li>- Managing stress based on affirmative thoughts</li> </ul> | 1: The physical stress reaction (Prof. Dr. Andreas Stengel) <sup>1</sup><br>2: The ABC Model of Experiencing stress <sup>2</sup><br>3: Dealing with stress <sup>2</sup> | 1: My Stress situation (ABC Model)<br>2: Using alternative/affirmative thoughts                                                                                                                                                                                                  | Anchoring in the moment by paying attention to our senses non-judgmentally - <i>vision</i> | Mindful Vision                         |

|    | Module        | Topic                                                                                                                                                | Skills                                                                                          |                                                                                                                                                                                                                                                                                                                    |                                                                                                                                        | Mindfulness                                                                                  |                                               |
|----|---------------|------------------------------------------------------------------------------------------------------------------------------------------------------|-------------------------------------------------------------------------------------------------|--------------------------------------------------------------------------------------------------------------------------------------------------------------------------------------------------------------------------------------------------------------------------------------------------------------------|----------------------------------------------------------------------------------------------------------------------------------------|----------------------------------------------------------------------------------------------|-----------------------------------------------|
|    |               |                                                                                                                                                      | Psychoeducation                                                                                 | Video(s)                                                                                                                                                                                                                                                                                                           | Skills-Exercise(s)                                                                                                                     | Topic                                                                                        | Audio-guided Practice                         |
| 13 | Creativity    | Exploring creativity as a resource of strength during cancer illness.                                                                                | - Introducing Art Therapy and its benefits                                                      | 1: Insights into art therapy (Edith Stosiek) <sup>1</sup><br>2: Instruction: Mindful Doodling (Edith Stosiek) <sup>1</sup>                                                                                                                                                                                         | 1: When was the last time I engaged in creativity?                                                                                     | Using the power of doodling without focusing on the result to anchor in the moment and relax | Mindful Doodling                              |
| 14 | Self-care     | Self-appreciation and self-care and their importance in the context of cancer                                                                        | - The pillars of self-esteem.                                                                   | 1: The pillars of self-esteem <sup>2</sup><br>2: The foundations of self-esteem (Dr. Johanna Graf) <sup>1</sup>                                                                                                                                                                                                    | 1: My pillars of self-esteem<br>2: Strengthening our foundation of self-esteem<br>- Self-care<br>- Self-Love/Kindness<br>- Mindfulness | Fostering self-compassion through mindfulness                                                | Mindful Self-Compassion                       |
| 15 | Relationships | Personal relationships as a resource and communication of health information and need toward family and friends in the context of the cancer illness | 1. The Partner<br>2. Children<br>3. Peers/Social Network                                        | 1: Introducing today's expert: Family and Couples therapist Mette Barslev <sup>1</sup><br>2: The relationship to our partner (Mette Barslev) <sup>1</sup><br>3: How the cancer illness of a parent can impact children (Mette Barslev) <sup>1</sup><br>4: How can I lean on my peers? (Mette Barslev) <sup>1</sup> | 1: Partner Exercise (Communicating needs and boundaries, exploring shared values and resources)<br>2: Communicating with peers         | Fostering the connection to oneself and others with loving kindness                          | Loving-Kindness                               |
| 16 | Looking back  | Review of the Make It Training and looking ahead                                                                                                     | - Reflecting on helpful skills<br>- Looking ahead: Using skills beyond the training (Skillsbox) | 1: Using the skills box beyond the Make It Training (Prof Dr. Stephan Zipfel) <sup>1</sup><br>2: Practicing Mindfulness on the road ahead (Dr. Johanna Graf) <sup>1</sup>                                                                                                                                          | Choosing Take Home messages                                                                                                            | Choosing a favorite exercise as part of the reflection<br>OR<br>BONUS exercise: Mindful walk | Favorite Mindfulness Practice OR Mindful Walk |

Note. **Mandatory Module**, Optional Module; <sup>1</sup> Camera recorded expert Videos, <sup>2</sup> explanatory cartoon videos created with the software *Powtoon*
